# Supplementary material for: Early selection of novel triploid hybrids of shrub willow with improved biomass yield relative to diploids
Source: PubMed Central journal article supplement (PMC3987697; doi:10.1186/1471-2229-14-74), 2014-03-24
Supplement: 1471-2229-14-74-S1.pdf [file 1471-2229-14-74-S1.pdf]

| Clone ID/Cultivar Epithet | Species/Pedigree                                                      | Nuclear DNA content (pg/2C) | Estimated Ploidy |
|---------------------------|-----------------------------------------------------------------------|-----------------------------|------------------|
| 'SV1'                     | <i>S. × dasyclados</i>                                                | 0.87                        | 2X               |
| 'S25'                     | <i>S. eriocephala</i>                                                 | 0.90                        | 2X               |
| 01-07-252                 | <i>S. eriocephala</i>                                                 | 1.16                        | 2X               |
| 05X-298-003               | <i>S. eriocephala</i> (01-03-210) × <i>S. eriocephala</i> (9837-004)  | 1.17                        | 2X               |
| 05X-298-019               | <i>S. eriocephala</i> (01-03-210) × <i>S. eriocephala</i> (9837-004)  | -                           | 2X               |
| 05X-298-035               | <i>S. eriocephala</i> (01-03-210) × <i>S. eriocephala</i> (9837-004)  | -                           | 2X               |
| 05X-298-038               | <i>S. eriocephala</i> (01-03-210) × <i>S. eriocephala</i> (9837-004)  | -                           | 2X               |
| 05X-299-016               | <i>S. eriocephala</i> (01-03-210) × <i>S. eriocephala</i> (01-06-085) | -                           | 2X               |
| 05X-299-044               | <i>S. eriocephala</i> (01-03-210) × <i>S. eriocephala</i> (01-06-085) | 1.02                        | 2X               |
| 05X-299-045               | <i>S. eriocephala</i> (01-03-210) × <i>S. eriocephala</i> (01-06-085) | -                           | 2X               |
| P63                       | <i>S. suchowensis</i>                                                 | 0.86                        | 2X               |
| 05X-278-005               | <i>S. integra</i> (P336) × <i>S. suchowensis</i> (P63)                | 0.77                        | 2X               |
| 05X-278-016               | <i>S. integra</i> (P336) × <i>S. suchowensis</i> (P63)                | -                           | 2X               |
| 05X-278-057               | <i>S. integra</i> (P336) × <i>S. suchowensis</i> (P63)                | -                           | 2X               |
| 05X-278-071               | <i>S. integra</i> (P336) × <i>S. suchowensis</i> (P63)                | -                           | 2X               |
| 05X-278-073               | <i>S. integra</i> (P336) × <i>S. suchowensis</i> (P63)                | -                           | 2X               |
| 'Boonville'               | <i>S. koriyanagi</i> (SH3) × <i>S. purpurea</i> (94001)               | 1.04                        | 2X               |
| 01X-265-019               | <i>S. koriyanagi</i> (SH3) × <i>S. purpurea</i> (94001)               | -                           | 2X               |
| 01X-265-027               | <i>S. koriyanagi</i> (SH3) × <i>S. purpurea</i> (94001)               | -                           | 2X               |
| 'Onondaga'                | <i>S. koriyanagi</i> (SH3) × <i>S. purpurea</i> (94002)               | 0.94                        | 2X               |
| 00-01-088                 | <i>S. purpurea</i>                                                    | 1.07                        | 2X               |
| 01-01-032                 | <i>S. purpurea</i>                                                    | 1.09                        | 2X               |
| 05-01-002                 | <i>S. purpurea</i>                                                    | 1.01                        | 2X               |
| 95026                     | <i>S. purpurea</i>                                                    | 0.90                        | 2X               |
| 05X-279-074               | <i>S. purpurea</i> (94006) × <i>S. purpurea</i> (02-201-005)          | 1.04                        | 2X               |
| 05X-279-080               | <i>S. purpurea</i> (94006) × <i>S. purpurea</i> (02-201-005)          | -                           | 2X               |
| 'Fish Creek'              | <i>S. purpurea</i> (94006) × <i>S. purpurea</i> (94001)               | 1.02                        | 2X               |
| 05X-293-021               | <i>S. purpurea</i> (05-01-002) × <i>S. purpurea</i> 'Fish Creek'      | -                           | 2X               |
| 05X-293-047               | <i>S. purpurea</i> (05-01-002) × <i>S. purpurea</i> 'Fish Creek'      | -                           | 2X               |

|             |                                                                                                                    |      |    |
|-------------|--------------------------------------------------------------------------------------------------------------------|------|----|
| 05X-293-053 | <i>S. purpurea</i> (05-01-002) × <i>S. purpurea</i> 'Fish Creek'                                                   | 1.06 | 2X |
| 'Alleghany' | <i>S. koriyanagi</i> (SH3) × <i>S. purpurea</i> (95058)                                                            | 0.95 | 2X |
| 05X-297-028 | ( <i>S. koriyanagi</i> × <i>S. purpurea</i> ) 'Alleghany' × <i>S. purpurea</i> (99239-011)                         | 1.12 | 2X |
| 05X-276-057 | ( <i>S. koriyanagi</i> × <i>S. purpurea</i> ) 'Alleghany' × <i>S. suchowensis</i> (P63)                            | 1.12 | 2X |
| 05X-276-061 | ( <i>S. koriyanagi</i> × <i>S. purpurea</i> ) 'Alleghany' × <i>S. suchowensis</i> (P63)                            | -    | 2X |
| 05X-276-065 | ( <i>S. koriyanagi</i> × <i>S. purpurea</i> ) 'Alleghany' × <i>S. suchowensis</i> (P63)                            | -    | 2X |
| 05X-276-076 | ( <i>S. koriyanagi</i> × <i>S. purpurea</i> ) 'Alleghany' × <i>S. suchowensis</i> (P63)                            | -    | 2X |
| 05X-275-024 | <i>S. purpurea</i> (01-01-032) × <i>S. suchowensis</i> (P63)                                                       | 1.15 | 2X |
| 05X-275-026 | <i>S. purpurea</i> (01-01-032) × <i>S. suchowensis</i> (P63)                                                       | -    | 2X |
| 02X-326-010 | <i>S. miyabeana</i> (9970-021) ×<br>( <i>S. viminalis</i> × ( <i>S. schwerinii</i> × <i>S. viminalis</i> )) 'Olof' | -    | 3X |
| 02X-326-015 | <i>S. miyabeana</i> (9970-021) ×<br>( <i>S. viminalis</i> × ( <i>S. schwerinii</i> × <i>S. viminalis</i> )) 'Olof' | 1.15 | 3X |
| 05X-295-011 | <i>S. purpurea</i> (05-01-002) × <i>S. miyabeana</i> 'SX64'                                                        | 1.21 | 3X |
| 05X-295-013 | <i>S. purpurea</i> (05-01-002) × <i>S. miyabeana</i> 'SX64'                                                        | -    | 3X |
| 05X-295-014 | <i>S. purpurea</i> (05-01-002) × <i>S. miyabeana</i> 'SX64'                                                        | -    | 3X |
| 05X-295-015 | <i>S. purpurea</i> (05-01-002) × <i>S. miyabeana</i> 'SX64'                                                        | -    | 3X |
| 05X-295-020 | <i>S. purpurea</i> (05-01-002) × <i>S. miyabeana</i> 'SX64'                                                        | 1.21 | 3X |
| 'Millbrook' | <i>S. purpurea</i> (95026) × <i>S. miyabeana</i> 'SX64'                                                            | 1.24 | 3X |
| 05X-292-035 | <i>S. purpurea</i> (95026) × <i>S. miyabeana</i> (01-200-003)                                                      | 1.24 | 3X |
| 05X-292-042 | <i>S. purpurea</i> (95026) × <i>S. miyabeana</i> (01-200-003)                                                      |      | 3X |
| 05X-281-034 | ( <i>S. koriyanagi</i> × <i>S. purpurea</i> ) 'Alleghany' × <i>S. miyabeana</i> 'SX67'                             | -    | 3X |
| 05X-281-043 | ( <i>S. koriyanagi</i> × <i>S. purpurea</i> ) 'Alleghany' × <i>S. miyabeana</i> 'SX67'                             | 1.21 | 3X |
| 05X-281-051 | ( <i>S. koriyanagi</i> × <i>S. purpurea</i> ) 'Alleghany' × <i>S. miyabeana</i> 'SX67'                             | -    | 3X |
| 05X-281-060 | ( <i>S. koriyanagi</i> × <i>S. purpurea</i> ) 'Alleghany' × <i>S. miyabeana</i> 'SX67'                             | -    | 3X |
| 05X-281-064 | ( <i>S. koriyanagi</i> × <i>S. purpurea</i> ) 'Alleghany' × <i>S. miyabeana</i> 'SX67'                             | -    | 3X |
| 05X-281-066 | ( <i>S. koriyanagi</i> × <i>S. purpurea</i> ) 'Alleghany' × <i>S. miyabeana</i> 'SX67'                             | -    | 3X |
| 05X-281-068 | ( <i>S. koriyanagi</i> × <i>S. purpurea</i> ) 'Alleghany' × <i>S. miyabeana</i> 'SX67'                             | 1.28 | 3X |
| 05X-281-071 | ( <i>S. koriyanagi</i> × <i>S. purpurea</i> ) 'Alleghany' × <i>S. miyabeana</i> 'SX67'                             | 1.29 | 3X |
| 05X-291-006 | <i>S. purpurea</i> (00-01-088) × <i>S. miyabeana</i> 'SX67'                                                        | -    | 3X |

|             |                                                                                                                |      |    |
|-------------|----------------------------------------------------------------------------------------------------------------|------|----|
| 05X-291-021 | <i>S. purpurea</i> (00-01-088) × <i>S. miyabeana</i> 'SX67'                                                    | -    | 3X |
| 05X-291-049 | <i>S. purpurea</i> (00-01-088) × <i>S. miyabeana</i> 'SX67'                                                    | 1.26 | 3X |
| 05X-291-050 | <i>S. purpurea</i> (00-01-088) × <i>S. miyabeana</i> 'SX67'                                                    | 1.22 | 3X |
| 'Sheridan'  | <i>S. viminalis</i> (SV2) × ( <i>S. viminalis</i> × <i>S. miyabeana</i> ) (99207-019)                          | 1.22 | 3X |
| 'Owasco'    | <i>S. viminalis</i> (SV7) × <i>S. miyabeana</i> 'SX64'                                                         | 1.21 | 3X |
| 01X-271-009 | <i>S. viminalis</i> (SV7) × <i>S. miyabeana</i> 'Canastota'                                                    | 1.15 | 3X |
| 02X-324-001 | (( <i>S. schwerinii</i> × <i>S. viminalis</i> ) × <i>S. viminalis</i> ) 'Torhild' × <i>S. miyabeana</i> 'SX64' | 1.20 | 3X |
| 01-200-001  | <i>S. miyabeana</i>                                                                                            | 1.48 | 4X |
| 'SX61'      | <i>S. miyabeana</i>                                                                                            | 1.53 | 4X |
| 'SX64'      | <i>S. miyabeana</i>                                                                                            | 1.55 | 4X |
| 'SX67'      | <i>S. miyabeana</i>                                                                                            | 1.52 | 4X |
| 05X-287-013 | <i>S. miyabeana</i> (01-200-001) × <i>S. miyabeana</i> 'SX64'                                                  | 1.54 | 4X |
| 05X-287-033 | <i>S. miyabeana</i> (01-200-001) × <i>S. miyabeana</i> 'SX64'                                                  | -    | 4X |
| 05X-287-089 | <i>S. miyabeana</i> (01-200-001) × <i>S. miyabeana</i> 'SX64'                                                  | -    | 4X |
| 05X-287-096 | <i>S. miyabeana</i> (01-200-001) × <i>S. miyabeana</i> 'SX64'                                                  | -    | 4X |
| 'Sherburne' | <i>S. miyabeana</i> 'SX61' × <i>S. miyabeana</i> 'SX67'                                                        | 1.73 | 4X |
| 01X-264-024 | <i>S. koriyanagi</i> (SH3) × ( <i>S. purpurea</i> × <i>S. miyabeana</i> ) (99218-013)                          | 1.85 | 4X |
| 01X-264-033 | <i>S. koriyanagi</i> (SH3) × ( <i>S. purpurea</i> × <i>S. miyabeana</i> ) (99218-013)                          | 1.82 | 4X |

---
