# Supplementary material for: Early selection of novel triploid hybrids of shrub willow with improved biomass yield relative to diploids
Source: PubMed Central journal article supplement (PMC3987697; doi:10.1186/1471-2229-14-74), 2014-03-24

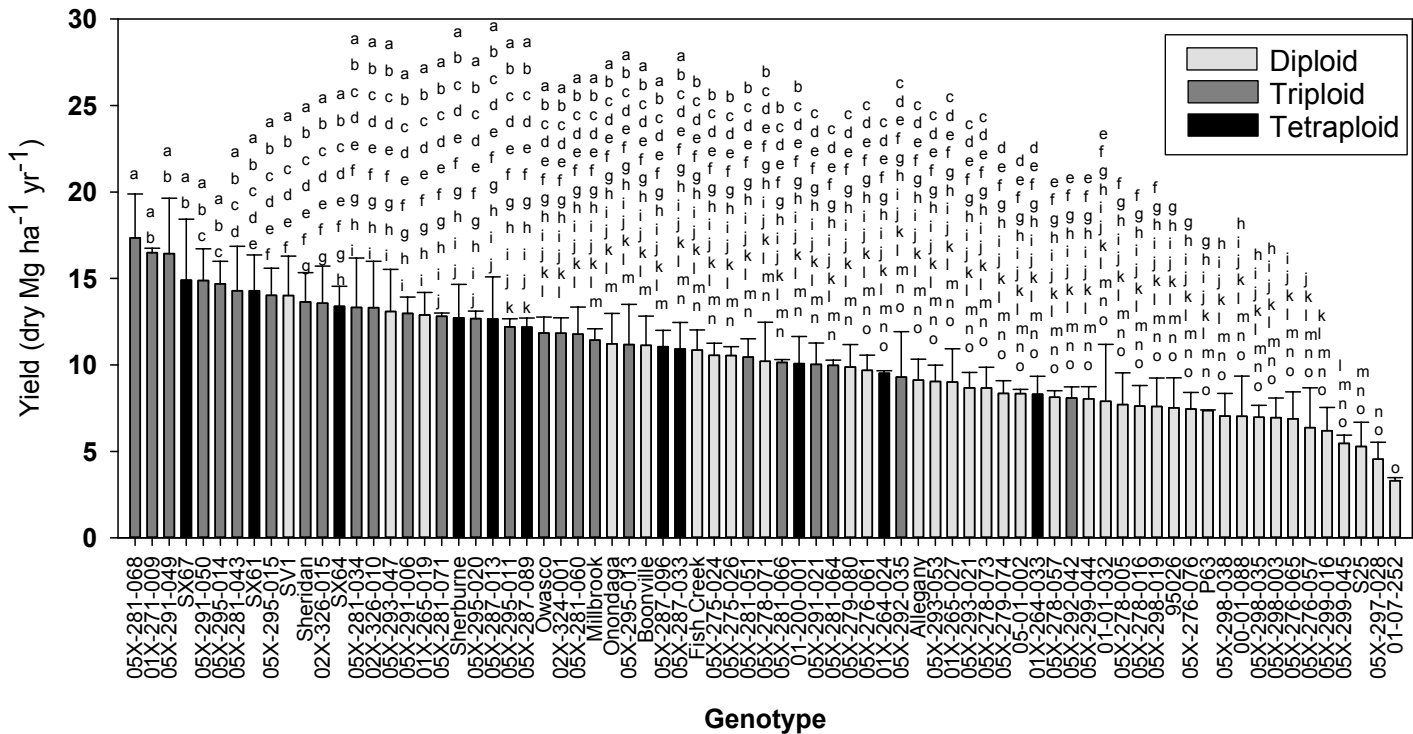

Supplement: 1471-2229-14-74-S2.pdf [file 1471-2229-14-74-S2.pdf]
