# Supplementary material for: Early selection of novel triploid hybrids of shrub willow with improved biomass yield relative to diploids
Source: PubMed Central journal article supplement (PMC3987697; doi:10.1186/1471-2229-14-74), 2014-03-24
Supplement: 1471-2229-14-74-S3.pdf [file 1471-2229-14-74-S3.pdf]

|                                        | Stem Diameter | Stem Area      | Stem Number     | Specific Gravity | Yield          |
|----------------------------------------|---------------|----------------|-----------------|------------------|----------------|
| <b>1<sup>st</sup> year Diploids</b>    |               |                |                 |                  |                |
| Height                                 | 0.15216       | <b>0.41634</b> | -0.09562        | 0.08700          | <b>0.59889</b> |
| Stem Diameter                          | -             | <b>0.80831</b> | <b>0.88835</b>  | -0.10531         | <b>0.36281</b> |
| Stem Area                              |               | -              | <b>0.45810</b>  | -0.10142         | <b>0.47663</b> |
| Stem Number                            |               |                | -               | -0.08083         | <b>0.20277</b> |
| Specific Gravity                       |               |                |                 | -                | 0.16692        |
| <b>1<sup>st</sup> year Triploids</b>   |               |                |                 |                  |                |
| Height                                 | 0.10276       | <b>0.40136</b> | -0.17533        | 0.09545          | <b>0.48699</b> |
| Stem Diameter                          | -             | <b>0.85038</b> | <b>0.90007</b>  | <b>-0.28490</b>  | <b>0.47751</b> |
| Stem Area                              |               | -              | <b>0.55154</b>  | <b>-0.23157</b>  | <b>0.62834</b> |
| Stem Number                            |               |                | -               | <b>-0.28530</b>  | <b>0.24399</b> |
| Specific Gravity                       |               |                |                 | -                | -0.01739       |
| <b>1<sup>st</sup> year Tetraploids</b> |               |                |                 |                  |                |
| Height                                 | 0.27339       | <b>0.46548</b> | 0.12416         | -0.00272         | <b>0.62244</b> |
| Stem Diameter                          | -             | <b>0.69956</b> | <b>0.90635</b>  | 0.30457          | 0.19188        |
| Stem Area                              |               | -              | <b>0.34992</b>  | 0.06816          | <b>0.54519</b> |
| Stem Number                            |               |                | -               | <b>0.38477</b>   | -0.03170       |
| Specific Gravity                       |               |                |                 | -                | 0.09185        |
| <b>2<sup>nd</sup> year Diploids</b>    |               |                |                 |                  |                |
| Height                                 | 0.07422       | <b>0.35499</b> | -0.14456        | <b>0.39886</b>   | <b>0.74136</b> |
| Stem Diameter                          | -             | <b>0.80934</b> | <b>0.90566</b>  | -0.16670         | <b>0.33480</b> |
| Stem Area                              |               | -              | <b>0.49844</b>  | -0.00212         | <b>0.46514</b> |
| Stem Number                            |               |                | -               | <b>-0.24240</b>  | 0.15519        |
| Specific Gravity                       |               |                |                 | -                | <b>0.42257</b> |
| <b>2<sup>nd</sup> year Triploids</b>   |               |                |                 |                  |                |
| Height                                 | 0.00022       | <b>0.22789</b> | -0.21149        | 0.12006          | <b>0.59223</b> |
| Stem Diameter                          | -             | <b>0.84703</b> | <b>0.88579</b>  | -0.10949         | <b>0.42434</b> |
| Stem Area                              |               | -              | <b>0.53668</b>  | -0.10175         | <b>0.52910</b> |
| Stem Number                            |               |                | -               | -0.07484         | <b>0.22180</b> |
| Specific Gravity                       |               |                |                 | -                | 0.15289        |
| <b>2<sup>nd</sup> year Tetraploids</b> |               |                |                 |                  |                |
| Height                                 | 0.36713       | <b>0.62027</b> | 0.03881         | <b>-0.34238</b>  | <b>0.54643</b> |
| Stem Diameter                          | -             | <b>0.78727</b> | <b>0.84581</b>  | -0.03484         | 0.28539        |
| Stem Area                              |               | -              | <b>0.35178</b>  | -0.16115         | <b>0.60179</b> |
| Stem Number                            |               |                | -               | 0.05084          | -0.11141       |
| Specific Gravity                       |               |                |                 | -                | -0.02115       |
| <b>3<sup>rd</sup> year Diploids</b>    |               |                |                 |                  |                |
| Height                                 | 0.12598       | <b>0.47482</b> | <b>-0.18728</b> | <b>0.33069</b>   | <b>0.72209</b> |
| Stem Diameter                          | -             | <b>0.70245</b> | <b>0.39833</b>  | 0.02770          | <b>0.45438</b> |
| Stem Area                              |               | -              | <b>0.18781</b>  | 0.13603          | <b>0.63476</b> |
| Stem Number                            |               |                | -               | -0.10155         | 0.04654        |
| Specific Gravity                       |               |                |                 | -                | <b>0.31078</b> |
| <b>3<sup>rd</sup> year Triploids</b>   |               |                |                 |                  |                |
| Height                                 | 0.03447       | <b>0.35545</b> | -0.12944        | 0.02758          | <b>0.58145</b> |

|                                        |         |                |                |          |                |
|----------------------------------------|---------|----------------|----------------|----------|----------------|
| Stem Diameter                          | -       | <b>0.65617</b> | <b>0.23312</b> | -0.18129 | <b>0.43821</b> |
| Stem Area                              | -       | -              | 0.13998        | -0.15099 | <b>0.50511</b> |
| Stem Number                            |         |                | -              | -0.17453 | 0.02739        |
| Specific Gravity                       |         |                |                | -        | 0.11502        |
| <b>3<sup>rd</sup> year Tetraploids</b> |         |                |                |          |                |
| Height                                 | 0.03195 | <b>0.41022</b> | -0.22185       | -0.06590 | <b>0.67332</b> |
| Stem Diameter                          | -       | <b>0.64895</b> | <b>0.77743</b> | 0.14234  | 0.27458        |
| Stem Area                              |         | -              | 0.07488        | -0.03822 | <b>0.67847</b> |
| Stem Number                            |         |                | -              | 0.16883  | -0.13934       |
| Specific Gravity                       |         |                |                | -        | -0.00247       |
